# Supplementary material
Source: PubMed Central journal article supplement (PMC9851305)
Supplement: mcac136_suppl_supplementary_figure_s1.pdf [file mcac136_suppl_supplementary_figure_s1.pdf]

# Fig. S1.

*Annals of Botany*: Elliott TL, Zedek F, Barrett RL *et al.*

## Title: Chromosome size matters: genome evolution in the cyperid clade

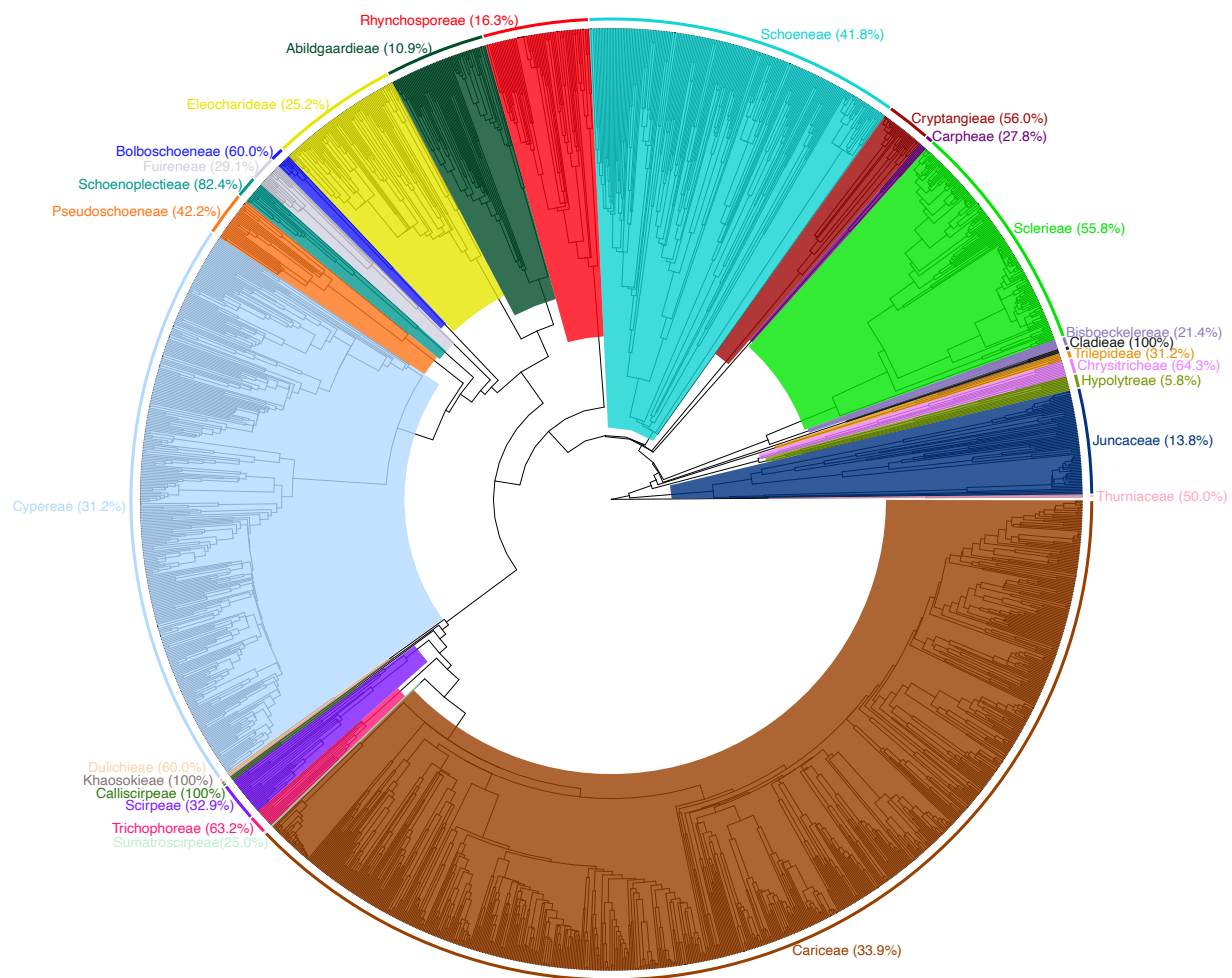

FIG. S1. Phylogenetic reconstruction of the cyperids (families Cyperaceae, Juncaceae, and Thurniaceae). Species associated with the twenty-four tribes of Cyperaceae, as well as the Juncaceae and Thurniaceae families are highlighted in contrasting colours. The numbers in parentheses represent the percent of species included in this phylogenetic reconstruction compared to the estimated number of species for each tribe or family as noted in Larridon *et al.* (2021) and POWO (2021). The phylogeny was created with the R package GGTREE v.2.4.2 (Yu *et al.*, 2017).
