# Supplementary material
Source: PubMed Central journal article supplement (PMC9851305)
Supplement: mcac136_suppl_supplementary_figure_s2.pdf [file mcac136_suppl_supplementary_figure_s2.pdf]

# Fig. S2.

*Annals of Botany*: Elliott TL, Zedek F, Barrett RL *et al.*

## Title: Chromosome size matters: genome evolution in the cyperid clade

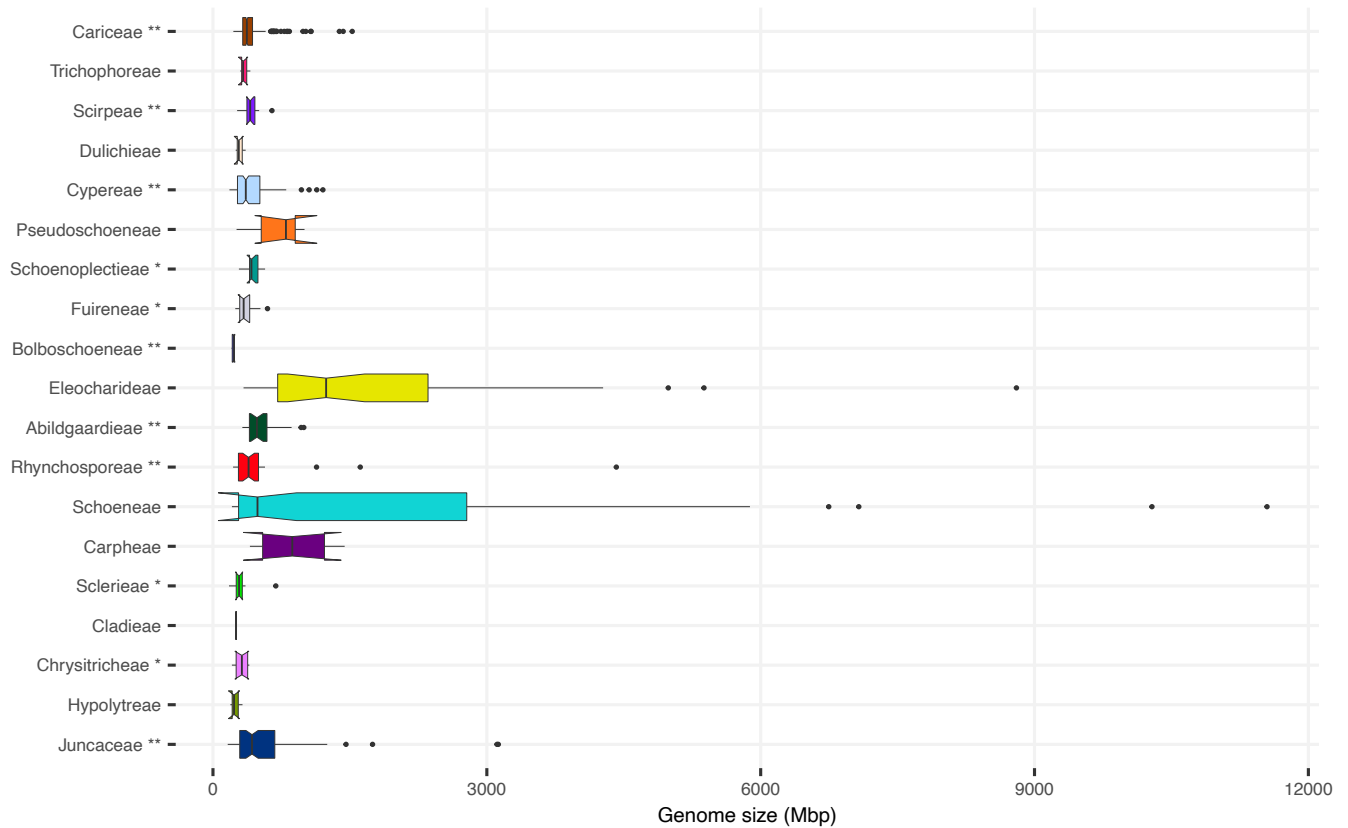

FIG. S2. Holoploid (1C: Mbp) genome sizes across Cyperids divided into 17 tribes of Cyperaceae, as well as the Juncaceae family. Major clades are represented by the same colours as in Fig. S1 and are presented in the same order as in the phylogeny shown in Fig. 2. Solid lines represent median values for the clades, outlying data are indicated by circles and lower and upper hinges correspond to the first and third quartiles, respectively. Significant differences in genome sizes between clades as determined by the Tukey-Kramer Procedure are indicated by asterisks beside the clade names. One asterisk indicates a significant difference between the genome size of the clade and that of Eleocharideae and Schoeneae ( $P < 0.05$ ), whereas two asterisks indicate a stronger significant difference ( $P < 0.001$ ).
