# Supplementary material
Source: PubMed Central journal article supplement (PMC9851305)
Supplement: mcac136_suppl_supplementary_figure_s7.pdf [file mcac136_suppl_supplementary_figure_s7.pdf]

# Fig. S7.

*Annals of Botany*: Elliott TL, Zedek F, Barrett RL *et al.*

## Title: Chromosome size matters: genome evolution in the cyperid clade

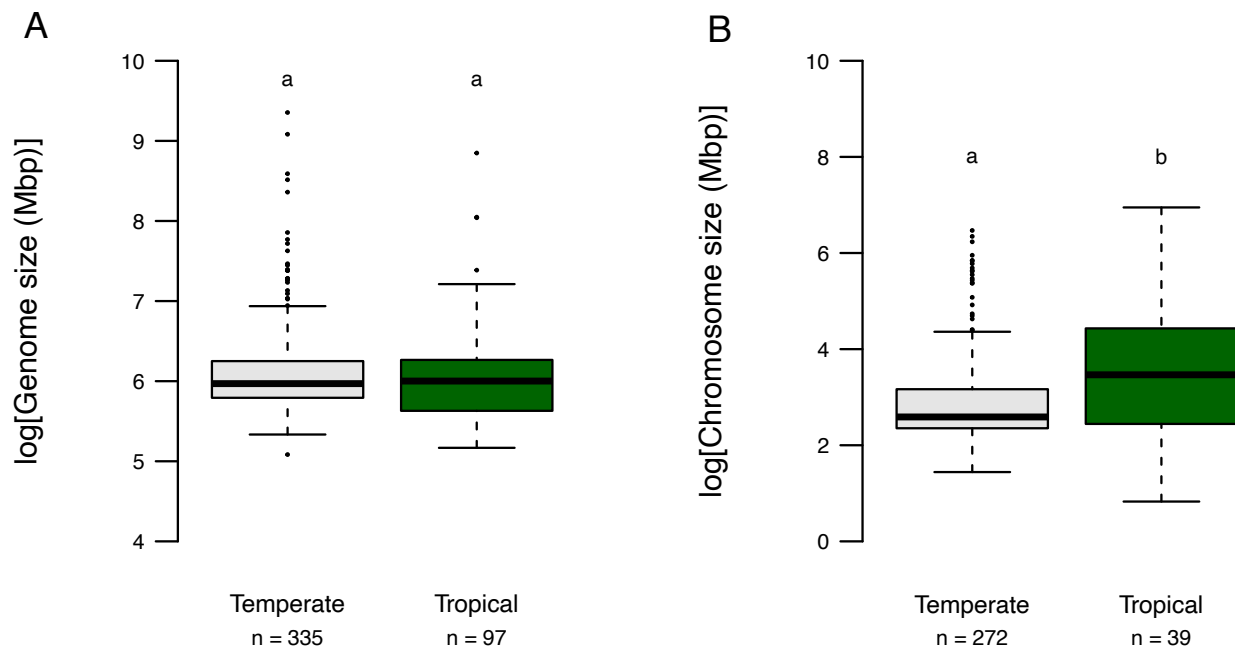

FIG. S7. Comparisons between genome sizes (A) and mean chromosome sizes (B) in temperate (light gray) versus tropical (green) cyperid species. Both genome and mean chromosome sizes were log transformed. Unique letters above the boxplots indicate significant differences among groups based on a one-factor ANOVA, and numbers at the bottom of the boxplots show the sample size of each group. The boxes cover 50% of the data values ranging between the 25<sup>th</sup> and 75<sup>th</sup> percentiles, whereas the whiskers above and below each box represent the interquartile range multiplied by 1.5. The line within each box represents the median, and outlying values are indicated by small circles. In addition, phylogenetic analyses were performed using the R package CAPER v.1.0.1 (Orme, 2013) and did not reveal a significant difference between groups for genome size or mean chromosome size.
