# Supplementary material
Source: PubMed Central journal article supplement (PMC9851305)
Supplement: mcac136_suppl_supplementary_figure_s8.pdf [file mcac136_suppl_supplementary_figure_s8.pdf]

# Fig. S8.

*Annals of Botany*: Elliott TL, Zedek F, Barrett RL *et al.*

## Title: Chromosome size matters: genome evolution in the cyperid clade

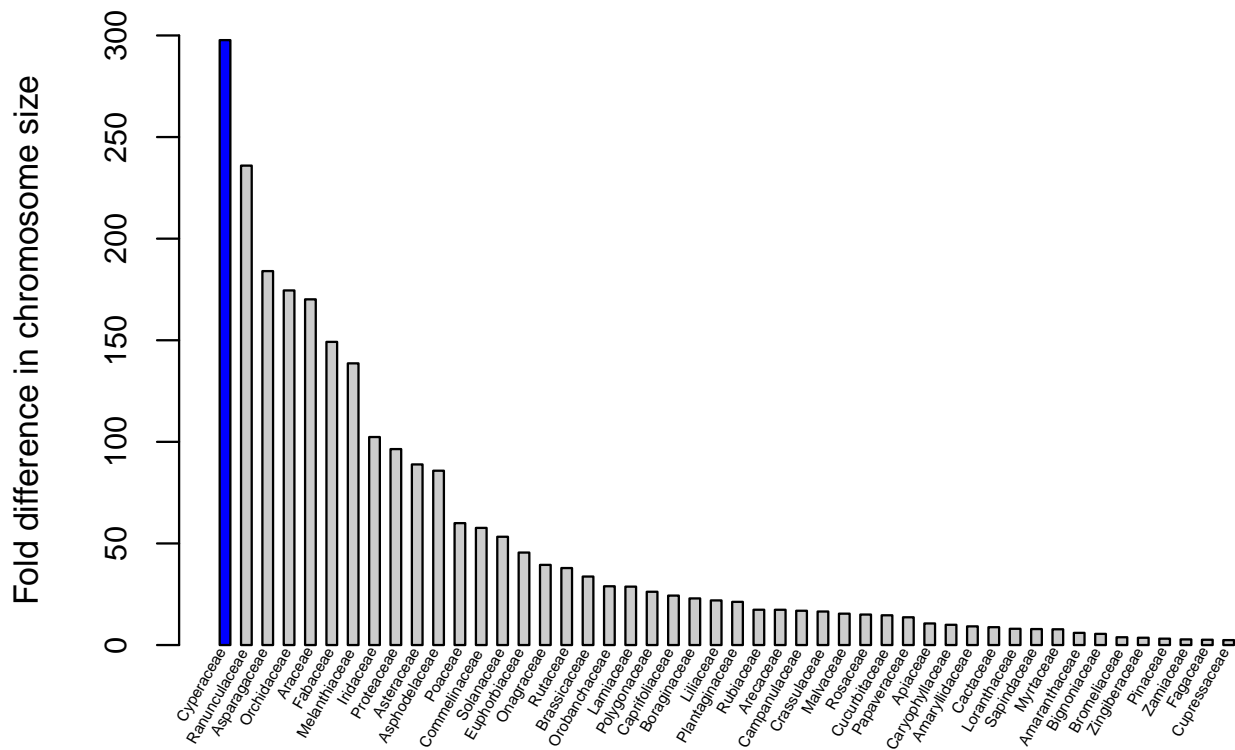

FIG. S8. Fold difference in mean chromosome size across 48 families of seed plants. Data were compiled from our study (Cyperaceae: shown in blue) and from the Plant DNA C-values database (Pellicer and Leitch, 2020) for the other 47 families. Only families with at least 20 observations from five different genera were included in the figure, which omitted the families Juncaceae and Lentibulariaceae among others.
