# Supplementary material
Source: PubMed Central journal article supplement (PMC9851305)
Supplement: mcac136_suppl_supplementary_figure_s10.pdf [file mcac136_suppl_supplementary_figure_s10.pdf]

# Fig. S10.

*Annals of Botany*: Elliott TL, Zedek F, Barrett RL *et al.*

## Title: Chromosome size matters: genome evolution in the cyperid clade

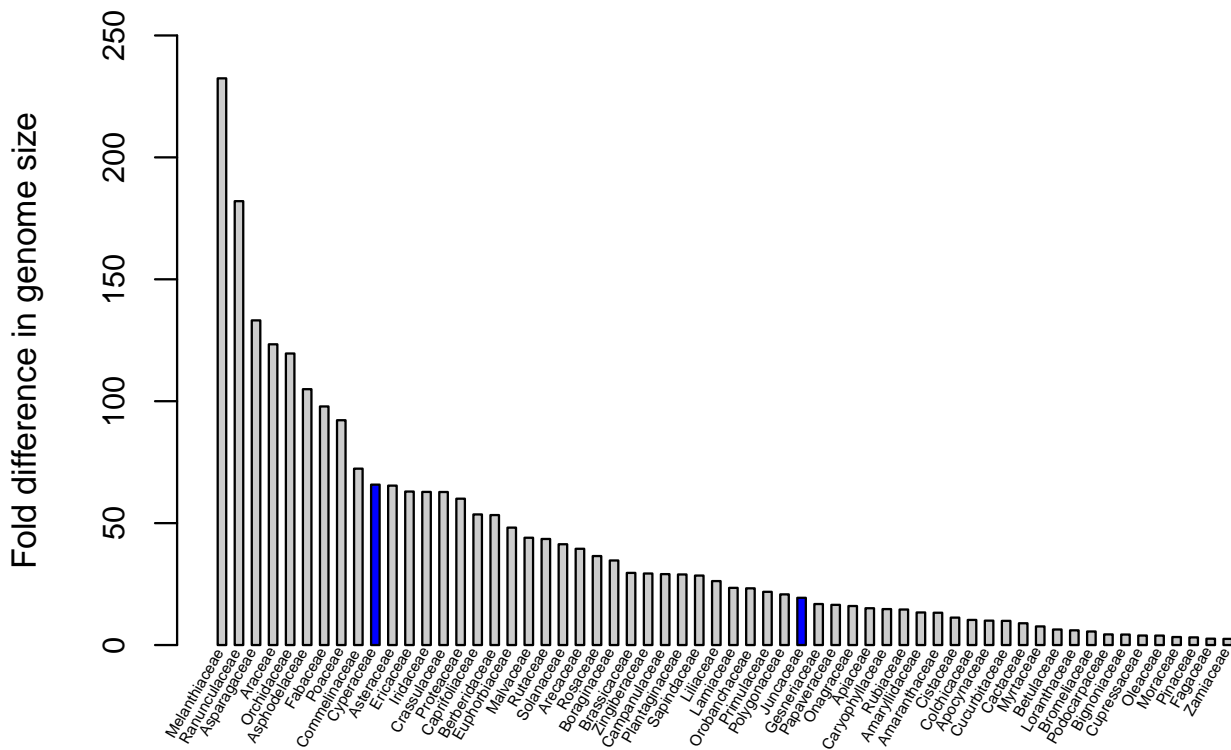

FIG. S10. Fold difference in genome size (Mbp) across 60 families of seed plants. Data were compiled from our study (Cyperaceae and Juncaceae: shown in blue) and from the Plant DNA C-values database (Pellicer and Leitch, 2020) for the other 58 families. Only families with at least 20 observations from five different genera were included in the figure.
