# Supplementary material
Source: PubMed Central journal article supplement (PMC9851305)
Supplement: mcac136_suppl_supplementary_figure_s12.pdf [file mcac136_suppl_supplementary_figure_s12.pdf]

# Fig. S12.

*Annals of Botany*: Elliott TL, Zedek F, Barrett RL *et al.*

## Title: Chromosome size matters: genome evolution in the cyperid clade

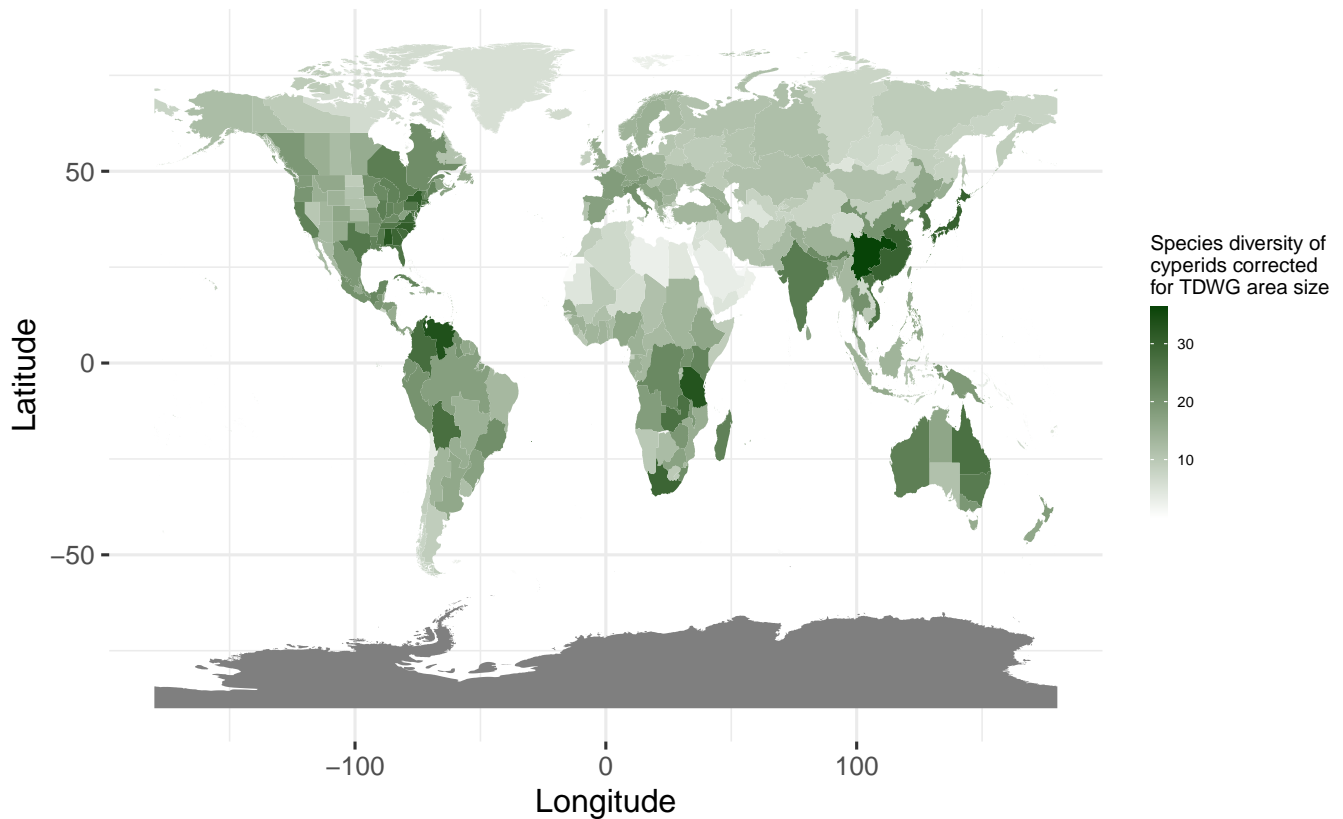

FIG. S12. Number of species of cyperids plotted per TDWG region (Brummitt *et al.*, 2001; Level-3 Continental and Regional Codes by the International Working Group on Taxonomic Databases for Plant Sciences). Regions with a high number of cyperid species are indicated in dark green, whereas those with low numbers of species are indicated by lighter shades of green. To account for differences in the sizes of TDWG regions, the number of species per region was divided by the log-transformed area of each region.
