# Supplementary material
Source: PubMed Central journal article supplement (PMC9851305)
Supplement: mcac136_suppl_supplementary_materials.pdf [file mcac136_suppl_supplementary_materials.pdf]

# Tables S1–S10

*Annals of Botany*: Elliott TL, Zedek F, Barrett RL *et al.*

## Title: Chromosome size matters: genome evolution in the cyperid clade

TABLE S1. *Changes in species names compared with those presented in the phylogenetic reconstruction of Larridon et al. (2021).*

| Name in Larridon <i>et al.</i> (2021)                         | Current name                                                                    | Reference                    |
|---------------------------------------------------------------|---------------------------------------------------------------------------------|------------------------------|
| <i>Fimbristylis hygrophila</i> Gordon-Gray                    | <i>Zulustylis hygrophila</i><br>(Gordon-Gray) Muasya                            | WCSP                         |
| <i>Fimbristylis ovata</i> (Burm.f.) J.Kern                    | <i>Abildgaardia ovata</i> (Burm.f.) Kral                                        | WCSP                         |
| <i>Fimbristylis variegata</i> Gordon-Gray                     | <i>Zulustylis variegata</i><br>(Gordon-Gray) Muasya                             | WCSP                         |
| <i>Isolepis marginata</i> (Thunb.) A.Dietr.                   | <i>Ficinia marginata</i> (Thunb.) Fourc.                                        | Muasya and Larridon (2021)   |
| <i>Oreobolopsis clementis</i> (M.E.Jones)<br>Dhooge & Goetgh. | <i>Trichophorm clementis</i><br>(M.E.Jones) S.G.Sm.                             | WCSP                         |
| <i>Oreobolopsis inversa</i> Dhooge & Goetgh.                  | <i>Trichophorum inversum</i> (Dhooge & Goetgh.)                                 | WCSP                         |
| <i>Oreobolopsis tepalifera</i> T.Koyama & Guagl.              | <i>Trichophorum tepaliferum</i> (T.Koyama & Guagl.)<br>Lév.-Bourret & J.R.Starr | WCSP                         |
| <i>Pleurostachys stricta</i> Kunth                            | <i>Rhynchospora panicoides</i> Schrad. ex Nees                                  | Thomas (2020)                |
| <i>Schoenus curvifolius</i> (R.Br.) Roem. & Schult.           | <i>Chaetospora curvifolia</i> R.Br.                                             | Barrett <i>et al.</i> (2020) |
| <i>Tetraria capillaris</i> (F.Muell.) J.M.Black               | <i>Netrostylis capillaris</i> (F.Muell.)<br>R.L.Barrett, J.J.Bruhl & K.L.Wilson | Barrett <i>et al.</i> (2021) |

TABLE S2. Representation of species in the phylogenetic reconstruction presented here, divided into families (*Juncaceae* and *Thurniaceae*) and tribes (*Cyperaceae*), compared with total species numbers estimated by other sources.

| Clade            | Number of species represented in phylogeny | Total number of species | Percentage of species represented in phylogeny | Source                        |
|------------------|--------------------------------------------|-------------------------|------------------------------------------------|-------------------------------|
| Abildgaardieae   | 62                                         | 571                     | 10.9                                           | Larridon <i>et al.</i> (2021) |
| Bisboeckelereae  | 6                                          | 28                      | 21.4                                           | Larridon <i>et al.</i> (2021) |
| Bolboschoeneae   | 9                                          | 15                      | 60                                             | Larridon <i>et al.</i> (2021) |
| Calliscirpeae    | 2                                          | 2                       | 100                                            | Larridon <i>et al.</i> (2021) |
| Cariceae         | 679                                        | 2003                    | 33.9                                           | Larridon <i>et al.</i> (2021) |
| Carpheae         | 5                                          | 18                      | 27.8                                           | Larridon <i>et al.</i> (2021) |
| Chrysitricheae   | 9                                          | 14                      | 64.3                                           | Larridon <i>et al.</i> (2021) |
| Cladieae         | 3                                          | 3                       | 100                                            | Larridon <i>et al.</i> (2021) |
| Cryptangieae     | 28                                         | 50                      | 56                                             | Larridon <i>et al.</i> (2021) |
| Cypereae         | 353                                        | 1131                    | 31.2                                           | Larridon <i>et al.</i> (2021) |
| Dulichieae       | 3                                          | 5                       | 60                                             | Larridon <i>et al.</i> (2021) |
| Eleocharideae    | 76                                         | 302                     | 25.2                                           | Larridon <i>et al.</i> (2021) |
| Fuireneae        | 16                                         | 55                      | 29.1                                           | Larridon <i>et al.</i> (2021) |
| Hypolytreae      | 10                                         | 172                     | 5.8                                            | Larridon <i>et al.</i> (2021) |
| Juncaceae        | 65                                         | 472                     | 13.8                                           | POWO (1-11-2021)              |
| Khaosokieae      | 1                                          | 1                       | 100                                            | Larridon <i>et al.</i> (2021) |
| Pseudoschoeneae  | 27                                         | 64                      | 42.2                                           | Larridon <i>et al.</i> (2021) |
| Rhynchosporae    | 65                                         | 399                     | 16.3                                           | Larridon <i>et al.</i> (2021) |
| Schoeneae        | 195                                        | 466                     | 41.8                                           | Larridon <i>et al.</i> (2021) |
| Schoenoplectieae | 14                                         | 17                      | 82.4                                           | Larridon <i>et al.</i> (2021) |
| Scirpeae         | 24                                         | 73                      | 32.9                                           | Larridon <i>et al.</i> (2021) |
| Sclerieae        | 144                                        | 258                     | 55.8                                           | Larridon <i>et al.</i> (2021) |
| Sumatrosirpeae   | 1                                          | 4                       | 25                                             | Larridon <i>et al.</i> (2021) |
| Thurniaceae      | 2                                          | 4                       | 50                                             | POWO (1-11-2021)              |
| Trichophoreae    | 12                                         | 19                      | 63.2                                           | Larridon <i>et al.</i> (2021) |
| Trilepideae      | 5                                          | 16                      | 31.2                                           | Larridon <i>et al.</i> (2021) |
| <b>Total</b>     | <b>1816</b>                                | <b>6162</b>             | <b>29.5</b>                                    |                               |

TABLE S3. *Representation of species with genome size estimations, divided into families (Juncaceae and Thurniaceae) and tribes (Cyperaceae), compared with total species numbers estimated by other sources.*

| Tribe            | Species represented in study | Total number of species | Percentage represented | Source                        |
|------------------|------------------------------|-------------------------|------------------------|-------------------------------|
| Abildgaardieae   | 20                           | 571                     | 3.5                    | Larridon <i>et al.</i> (2021) |
| Bolboschoeneae   | 12                           | 15                      | 80                     | Larridon <i>et al.</i> (2021) |
| Cariceae         | 287                          | 2003                    | 14.3                   | Larridon <i>et al.</i> (2021) |
| Carpheae         | 4                            | 18                      | 22.2                   | Larridon <i>et al.</i> (2021) |
| Chrysitricheae   | 7                            | 14                      | 50                     | Larridon <i>et al.</i> (2021) |
| Cladieae         | 1                            | 3                       | 33.3                   | Larridon <i>et al.</i> (2021) |
| Cypereae         | 153                          | 1131                    | 13.5                   | Larridon <i>et al.</i> (2021) |
| Dulichieae       | 3                            | 5                       | 60                     | Larridon <i>et al.</i> (2021) |
| Eleocharideae    | 34                           | 302                     | 11.3                   | Larridon <i>et al.</i> (2021) |
| Fuireneae        | 8                            | 55                      | 14.5                   | Larridon <i>et al.</i> (2021) |
| Hypolytreae      | 3                            | 172                     | 1.7                    | Larridon <i>et al.</i> (2021) |
| Juncaceae        | 80                           | 472                     | 16.9                   | POWO (1-11-2021)              |
| Pseudoschoeneae  | 3                            | 64                      | 4.7                    | Larridon <i>et al.</i> (2021) |
| Rhynchosporeae   | 28                           | 399                     | 7                      | Larridon <i>et al.</i> (2021) |
| Schoeneae        | 83                           | 466                     | 17.8                   | Larridon <i>et al.</i> (2021) |
| Schoenoplectieae | 9                            | 17                      | 52.9                   | Larridon <i>et al.</i> (2021) |
| Scirpeae         | 11                           | 73                      | 15.1                   | Larridon <i>et al.</i> (2021) |
| Sclerieae        | 7                            | 258                     | 2.7                    | Larridon <i>et al.</i> (2021) |
| Thurniaceae      | 1                            | 4                       | 25                     | POWO (1-11-2021)              |
| Trichophoreae    | 3                            | 19                      | 15.8                   | Larridon <i>et al.</i> (2021) |
| <b>Total</b>     | <b>757</b>                   | <b>6061</b>             | <b>12.5</b>            |                               |

TABLE S4. *Pearson's correlation coefficients greater than 0.70 or less than -0.70 for 31 variables, including holoploid genome size (1C) for analyses with a minimum number of 25 observations per species.*

| Retained variables | Omitted variables   | Correlation coefficient |
|--------------------|---------------------|-------------------------|
| Lat                | CEC                 | 0.77                    |
| Lat                | N                   | 0.74                    |
| Lat                | Temp_ann            | -0.9                    |
| Lat                | Isothermality       | -0.89                   |
| Lat                | Tempseason          | 0.73                    |
| Lat                | Temp_max_warm_month | -0.76                   |
| Lat                | Temp_min_cold_month | -0.84                   |
| Lat                | Temp_wet_quart      | -0.72                   |
| Lat                | Temp_dry_quart      | -0.77                   |
| Lat                | Temp_cold_quart     | -0.78                   |
| Lat                | Temp_warm_quart     | -0.88                   |
| Lat                | Prec_wet_month      | -0.72                   |
| Lat                | Prec_wet_quart      | -0.72                   |
| Lat                | GDD                 | -0.87                   |
| Lat                | PET                 | -0.91                   |
| SOC                | Bdod                | -0.82                   |
| SOC                | CEC                 | 0.8                     |
| SOC                | N                   | 0.88                    |
| SOC                | Temp_max_warm_month | -0.82                   |
| SOC                | Temp_cold_quart     | -0.77                   |
| SOC                | PET                 | -0.78                   |
| Temp_range         | Temp_ann            | -0.71                   |
| Temp_range         | Isothermality       | -0.77                   |
| Temp_range         | Temp_season         | 0.97                    |
| Temp_range         | Temp_min_cold_month | -0.89                   |
| Temp_range         | Temp_dry_quart      | -0.83                   |
| Temp_range         | Temp_warm_quart     | -0.85                   |
| Prec_ann           | Prec_wet_month      | 0.87                    |
| Prec_ann           | Prec_wet_quart      | 0.88                    |
| Prec_ann           | Prec_warm_quart     | 0.77                    |
| Prec_dry_month     | Prec_season         | -0.7                    |
| Prec_dry_month     | Prec_dry_quart      | 1                       |

Only pairwise coefficients greater than 0.70 or less -0.70 are shown, as this information is relevant for subsequent analyses. The following abbreviations are used: 'Lat' (latitude); 'CEC' (cation exchange capacity); 'N' (total nitrogen); 'Temp\_ann' (mean annual air temperature); 'Isothermality' (oscillation in day- to-night temperatures relative to the summer-to-winter oscillations); 'Temp\_season' (standard deviation of the monthly mean temperatures); 'Temp\_max\_warm\_month' (mean maximum air temperature of the warmest month); 'Temp\_min\_cold\_month' (mean minimum air temperature of the coldest month); 'Temp\_wet\_quart' (mean daily air temperatures of the wettest quarter); 'Temp\_dry\_quart' (mean daily air temperatures of the driest quarter); 'Temp\_cold\_quart' (mean daily minimum air temperature of the coldest quarter); 'Temp\_warm\_quart' (mean daily minimum air temperature of the warmest quarter); 'Prec\_wet\_month' (precipitation of the wettest month); 'Prec\_wet\_quart' (precipitation of the wettest quarter); 'GDD' (growing degree days); 'PET' (potential evapotranspiration); 'Bdod' (bulk density of the fine earth fraction); 'SOC' (soil organic carbon); 'Temp\_range' (annual range of air temperature); 'Prec\_ann' (annual precipitation); 'Prec\_warm\_quart' (precipitation of the warmest quarter); 'Prec\_dry\_month' (precipitation of the driest month); 'Prec\_season' (precipitation seasonality); and 'Prec\_dry\_quart' (precipitation of the driest quarter). Only species with a minimum number of 25 observations were included in the analyses.

TABLE S5. *Pearson's correlation coefficients greater than 0.70 or less than -0.70 for 31 variables, including holoploid genome size (1C) or analyses with a minimum number of 50 observations per species.*

| Retained variables | Omitted variables   | Correlation coefficient |
|--------------------|---------------------|-------------------------|
| Lat                | CEC                 | 0.79                    |
| Lat                | N                   | 0.77                    |
| Lat                | SOC                 | 0.7                     |
| Lat                | Temp_ann            | -0.91                   |
| Lat                | Isothermality       | -0.9                    |
| Lat                | Temp_season         | 0.73                    |
| Lat                | Temp_max_warm_month | -0.8                    |
| Lat                | Temp_min_cold_month | -0.85                   |
| Lat                | Temp_wet_quart      | -0.74                   |
| Lat                | Temp_dry_quart      | -0.79                   |
| Lat                | Temp_cold_quart     | -0.81                   |
| Lat                | Temp_warm_quart     | -0.89                   |
| Lat                | Prec_wet_month      | -0.73                   |
| Lat                | Prec_wet_quart      | -0.73                   |
| Lat                | GDD                 | -0.87                   |
| Lat                | PET                 | -0.93                   |
| Bdod               | CEC                 | -0.75                   |
| Bdod               | SOC                 | -0.82                   |
| Bdod               | Temp_max_warm_month | 0.81                    |
| Bdod               | Temp_cold_quart     | 0.75                    |
| Temp_range         | Temp_ann            | -0.71                   |
| Temp_range         | Isothermality       | -0.76                   |
| Temp_range         | Temp_season         | 0.97                    |
| Temp_range         | Temp_min_cold_month | -0.88                   |
| Temp_range         | Temp_dry_quart      | -0.83                   |
| Temp_range         | Temp_warm_quart     | -0.85                   |
| Prec_ann           | Prec_wet_month      | 0.87                    |
| Prec_ann           | Prec_wet_quart      | 0.87                    |
| Prec_ann           | Prec_warm_quart     | 0.77                    |
| Prec_dry_month     | Prec_season         | -0.71                   |
| Prec_dry_month     | Prec_dry_quart      | 1                       |

Only pairwise coefficients greater than 0.70 or less -0.70 are shown, as this information is relevant for subsequent analyses. The following abbreviations are used: 'Lat' (latitude); 'CEC' (cation exchange capacity); 'N' (total nitrogen); 'Temp\_ann' (mean annual air temperature); 'Isothermality' (oscillation in day- to-night temperatures relative to the summer-to-winter oscillations); 'Temp\_season' (standard deviation of the monthly mean temperatures); 'Temp\_max\_warm\_month' (mean maximum air temperature of the warmest month); 'Temp\_min\_cold\_month' (mean minimum air temperature of the coldest month); 'Temp\_wet\_quart' (mean daily air temperatures of the wettest quarter); 'Temp\_dry\_quart' (mean daily air temperatures of the driest quarter); 'Temp\_cold\_quart' (mean daily minimum air temperature of the coldest quarter); 'Temp\_warm\_quart' (mean daily minimum air temperature of the warmest quarter); 'Prec\_wet\_month' (precipitation of the wettest month); 'Prec\_wet\_quart' (precipitation of the wettest quarter); 'GDD' (growing degree days); 'PET' (potential evapotranspiration); 'Bdod' (bulk density of the fine earth fraction); 'SOC' (soil organic carbon); 'Temp\_range' (annual range of air temperature); 'Prec\_ann' (annual precipitation); 'Prec\_warm\_quart' (precipitation of the warmest quarter); 'Prec\_dry\_month' (precipitation of the driest month); 'Prec\_season' (precipitation seasonality); and 'Prec\_dry\_quart' (precipitation of the driest quarter). Only species with a minimum number of 50 observations were included in the analyses.

TABLE S6. *Pearson's correlation coefficients greater than 0.70 or less than -0.70 for 31 variables, including mean chromosome size (2C/2n) for analyses with a minimum number of 25 observations per species.*

| Retained variables | Omitted variables   | Correlation coefficient |
|--------------------|---------------------|-------------------------|
| Lat                | CEC                 | 0.77                    |
| Lat                | N                   | 0.75                    |
| Lat                | SOC                 | 0.7                     |
| Lat                | Temp_ann            | -0.88                   |
| Lat                | Isothermality       | -0.88                   |
| Lat                | Temp_max_warm_month | -0.77                   |
| Lat                | Temp_min_cold_month | -0.8                    |
| Lat                | Temp_dry_quart      | -0.75                   |
| Lat                | Temp_cold_quart     | -0.79                   |
| Lat                | Temp_warm_quart     | -0.84                   |
| Lat                | Prec_wet_month      | -0.77                   |
| Lat                | Prec_wet_quart      | -0.77                   |
| Lat                | GDD                 | -0.85                   |
| Lat                | PET                 | -0.93                   |
| Bdod               | CEC                 | -0.77                   |
| Bdod               | N                   | -0.7                    |
| Bdod               | SOC                 | -0.85                   |
| Bdod               | Temp_max_warm_month | 0.83                    |
| Bdod               | Temp_cold_quart     | 0.78                    |
| Temp_range         | Isothermality       | -0.74                   |
| Temp_range         | Temp_season         | 0.97                    |
| Temp_range         | Temp_min_cold_month | -0.87                   |
| Temp_range         | Temp_dry_quart      | -0.8                    |
| Temp_range         | Temp_warm_quart     | -0.83                   |
| Prec_ann           | Prec_wet_month      | 0.88                    |
| Prec_ann           | Prec_wet_quart      | 0.88                    |
| Prec_ann           | Prec_warm_quart     | 0.73                    |
| Prec_ann           | Prec_cold_quart     | 0.72                    |
| Prec_dry_month     | Prec_dry_quart      | 1                       |

Only pairwise coefficients greater than 0.70 or less -0.70 are shown, as this information is relevant for subsequent analyses. The following abbreviations are used: 'Lat' (latitude); 'CEC' (cation exchange capacity); 'N' (total nitrogen); 'Temp\_ann' (mean annual air temperature); 'Isothermality' (oscillation in day- to-night temperatures relative to the summer-to-winter oscillations); 'Temp\_season' (standard deviation of the monthly mean temperatures); 'Temp\_max\_warm\_month' (mean maximum air temperature of the warmest month); 'Temp\_min\_cold\_month' (mean minimum air temperature of the coldest month); 'Temp\_wet\_quart' (mean daily air temperatures of the wettest quarter); 'Temp\_dry\_quart' (mean daily air temperatures of the driest quarter); 'Temp\_cold\_quart' (mean daily minimum air temperature of the coldest quarter); 'Temp\_warm\_quart' (mean daily minimum air temperature of the warmest quarter); 'Prec\_wet\_month' (precipitation of the wettest month); 'Prec\_wet\_quart' (precipitation of the wettest quarter); 'GDD' (growing degree days); 'PET' (potential evapotranspiration); 'Bdod' (bulk density of the fine earth fraction); 'SOC' (soil organic carbon); 'Temp\_range' (annual range of air temperature); 'Prec\_ann' (annual precipitation); 'Prec\_warm\_quart' (precipitation of the warmest quarter); 'Prec\_cold\_quart' (precipitation of the coldest quarter); 'Prec\_dry\_month' (precipitation of the driest month); 'Prec\_season' (precipitation seasonality); and 'Prec\_dry\_quart' (precipitation of the driest quarter). Only species with a minimum number of 25 observations were included in the analyses.

TABLE S7. *Pearson's correlation coefficients greater than 0.70 or less than -0.70 for 31 variables, including mean chromosome size (2C/2n) for analyses with a minimum number of 50 observations per species.*

| Retained variables | Omitted variables   | Correlation coefficient |
|--------------------|---------------------|-------------------------|
| Lat                | CEC                 | 0.79                    |
| Lat                | N                   | 0.77                    |
| Lat                | SOC                 | 0.71                    |
| Lat                | Temp_ann            | -0.89                   |
| Lat                | Isothermality       | -0.89                   |
| Lat                | Temp_max_warm_month | -0.8                    |
| Lat                | Temp_min_cold_month | -0.8                    |
| Lat                | Temp_dry_quart      | -0.76                   |
| Lat                | Temp_cold_quart     | -0.81                   |
| Lat                | Temp_warm_quart     | -0.84                   |
| Lat                | Prec_wet_month      | -0.77                   |
| Lat                | Prec_wet_quart      | -0.77                   |
| Lat                | GDD                 | -0.85                   |
| Lat                | PET                 | -0.93                   |
| Bdod               | CEC                 | -0.78                   |
| Bdod               | SOC                 | -0.85                   |
| Bdod               | Temp_max_warm_month | 0.83                    |
| Bdod               | Temp_cold_quart     | 0.78                    |
| Temp_range         | Isothermality       | -0.74                   |
| Temp_range         | Temp_season         | 0.98                    |
| Temp_range         | Temp_min_cold_month | -0.88                   |
| Temp_range         | Temp_dry_quart      | -0.8                    |
| Temp_range         | Temp_warm_quart     | -0.84                   |
| Prec_ann           | Prec_wet_month      | 0.88                    |
| Prec_ann           | Prec_wet_quart      | 0.89                    |
| Prec_ann           | Prec_warm_quart     | 0.74                    |
| Prec_ann           | Prec_cold_quart     | 0.74                    |
| Prec_dry_month     | Prec_dry_quart      | 1                       |

Only pairwise coefficients greater than 0.70 or less -0.70 are shown, as this information is relevant for subsequent analyses. The following abbreviations are used: 'Lat' (latitude); 'CEC' (cation exchange capacity); 'N' (total nitrogen); 'Temp\_ann' (mean annual air temperature); 'Isothermality' (oscillation in day- to-night temperatures relative to the summer-to-winter oscillations); 'Temp\_season' (standard deviation of the monthly mean temperatures); 'Temp\_max\_warm\_month' (mean maximum air temperature of the warmest month); 'Temp\_min\_cold\_month' (mean minimum air temperature of the coldest month); 'Temp\_wet\_quart' (mean daily air temperatures of the wettest quarter); 'Temp\_dry\_quart' (mean daily air temperatures of the driest quarter); 'Temp\_cold\_quart' (mean daily minimum air temperature of the coldest quarter); 'Temp\_warm\_quart' (mean daily minimum air temperature of the warmest quarter); 'Prec\_wet\_month' (precipitation of the wettest month); 'Prec\_wet\_quart' (precipitation of the wettest quarter); 'GDD' (growing degree days); 'PET' (potential evapotranspiration); 'Bdod' (bulk density of the fine earth fraction); 'SOC' (soil organic carbon); 'Temp\_range' (annual range of air temperature); 'Prec\_ann' (annual precipitation); 'Prec\_warm\_quart' (precipitation of the warmest quarter); 'Prec\_cold\_quart' (precipitation of the coldest quarter); 'Prec\_dry\_month' (precipitation of the driest month); 'Prec\_season' (precipitation seasonality); and 'Prec\_dry\_quart' (precipitation of the driest quarter). Only species with a minimum number of 50 observations were included in the analyses.

TABLE S8. Results from multiple phylogenetic generalized least squares (PGLS) analyses with holoploid genome size (1C: Mbp) as the response variable.

| Predictor variable(s) | logLik  | Estimate | StdErr | t-value | R <sup>2</sup> <sub>adj</sub> | AIC    | delta AIC | AICw | P    | P (corrected) |
|-----------------------|---------|----------|--------|---------|-------------------------------|--------|-----------|------|------|---------------|
| EOO                   | -203.59 | -0.03    | 0.01   | -2.71   | 0.01                          | 411.18 | 0         | 0.39 | 0.01 | 0.06          |
| Prec_dry_month        | -203.63 | 0.03     | 0.01   | 2.7     | 0.01                          | 411.25 | 0.07      | 0.37 | 0.01 | 0.06          |
| Prec_ann              | -205.58 | 0.1      | 0.06   | 1.82    | 0.01                          | 415.16 | 3.99      | 0.05 | 0.07 | 0.28          |
| Bdod                  | -205.86 | -0.29    | 0.17   | -1.66   | 0                             | 415.72 | 4.54      | 0.04 | 0.1  | 0.3           |
| Intercept             | -207.25 | NA       | NA     | NA      | 0                             | 416.49 | 5.32      | 0.03 | NA   | NA            |
| Diurnal_range         | -206.2  | -0.13    | 0.09   | -1.45   | 0                             | 416.4  | 5.22      | 0.03 | 0.15 | 0.3           |
| Latitude              | -206.16 | 0.03     | 0.02   | 1.47    | 0                             | 416.32 | 5.14      | 0.03 | 0.14 | 0.3           |
| pH                    | -207.17 | -0.09    | 0.23   | -0.39   | 0                             | 418.34 | 7.16      | 0.01 | 0.7  | 0.84          |
| P                     | -207.23 | 0        | 0.01   | -0.18   | 0                             | 418.46 | 7.28      | 0.01 | 0.86 | 0.94          |
| Temp_range            | -207.06 | -0.05    | 0.08   | -0.61   | 0                             | 418.12 | 6.94      | 0.01 | 0.54 | 0.76          |
| Niche                 | -207.02 | -0.01    | 0.02   | -0.68   | 0                             | 418.04 | 6.86      | 0.01 | 0.5  | 0.76          |
| Elevation             | -207.08 | 0.01     | 0.02   | 0.57    | 0                             | 418.17 | 6.99      | 0.01 | 0.57 | 0.76          |

Results are ranked in order of descending AICw values. Analyses were performed using the R package CAPER v.1.0.1 (Orme, 2013) and all variables were log transformed, except for Prec\_dry\_month, P and Latitude, which were transformed by the square root. Lambda was fixed at 0.879. The following abbreviations are used to represent the environmental variables included in these analyses: pH (soil pH); 'Bdod' (bulk density of the fine earth fraction); 'P' (available phosphorous); 'Diurnal\_range' (mean diurnal air temperature range); 'Temp\_range' (annual range of air temperature); 'Prec\_ann' (annual precipitation); 'Prec\_dry\_month' (precipitation of the driest month); 'Prec\_cold\_quart' (precipitation of the coldest quarter); 'EOO' (extent of occurrence), and 'Niche' (niche size). Corrections for multiple comparisons were implemented using the method of Benjamini and Hochberg (1995), and the alpha value was set at 0.05. Only species with a minimum number of 50 observations were included in the analyses.



TABLE S9. Results from multiple phylogenetic generalized least squares (PGLS) analyzes with mean chromosome size ( $2C/2n$ ) as the response variable.

| Predictor variable(s) | logLik  | Estimate | StdErr | t-value | $R^2_{adj}$ | AIC    | delta AIC | AICw | $P$  | $P$ (corrected) |
|-----------------------|---------|----------|--------|---------|-------------|--------|-----------|------|------|-----------------|
| EOO                   | -236.7  | -0.12    | 0.02   | -5.05   | 0.08        | 477.41 | 0         | 1    | 0    | <0.001          |
| Prec_ann              | -246.26 | 0.25     | 0.11   | 2.34    | 0.02        | 496.52 | 19.11     | 0    | 0.02 | 0.08            |
| Prec_dry_month        | -246.27 | 0.05     | 0.02   | 2.33    | 0.02        | 496.54 | 19.14     | 0    | 0.02 | 0.08            |
| Niche                 | -247.1  | -0.07    | 0.04   | -1.94   | 0.01        | 498.21 | 20.8      | 0    | 0.05 | 0.15            |
| P                     | -247.61 | 0.03     | 0.02   | 1.65    | 0.01        | 499.22 | 21.82     | 0    | 0.1  | 0.24            |
| Latitude              | -247.88 | -0.07    | 0.05   | -1.48   | 0           | 499.76 | 22.36     | 0    | 0.14 | 0.28            |
| Intercept             | -248.98 | NA       | NA     | NA      | 0           | 499.96 | 22.56     | 0    | NA   | NA              |
| Diurnal_range         | -248.41 | 0.19     | 0.18   | 1.06    | 0           | 500.83 | 23.42     | 0    | 0.29 | 0.46            |
| Bdod                  | -248.46 | 0.31     | 0.31   | 1.02    | 0           | 500.93 | 23.52     | 0    | 0.31 | 0.46            |
| pH                    | -248.73 | 0.29     | 0.41   | 0.71    | 0           | 501.46 | 24.05     | 0    | 0.48 | 0.56            |
| Temp_range            | -248.75 | -0.11    | 0.16   | -0.67   | 0           | 501.51 | 24.1      | 0    | 0.5  | 0.56            |
| Elevation             | -248.76 | 0.03     | 0.04   | 0.66    | 0           | 501.52 | 24.12     | 0    | 0.51 | 0.56            |

Results are ranked in order of descending AICw values. Analyses were performed using the R package CAPER v.1.0.1 (Orme, 2013) and all variables were log transformed, except for P and Prec\_dry\_month, which were transformed by the square root. Lambda was fixed at 0.903. The following abbreviations are used to represent the environmental variables included in these analyses: pH (soil pH); 'Bdod' (bulk density of the fine earth fraction); 'P' (available phosphorous); 'Diurnal\_range' (mean diurnal air temperature range); 'Temp\_range' (annual range of air temperature); 'Prec\_ann' (annual precipitation); 'Prec\_dry\_month' (precipitation of the driest month); 'EOO' (extent of occurrence); and 'Niche' (niche size). Corrections for multiple comparisons were implemented using the method of Benjamini and Hochberg (1995), and the alpha value was set at 0.05. Only species with a minimum number of 50 observations were included in the analyses.

TABLE S10. Association between diploid chromosome number and holoploid genome size (Mbp) in three tribes of Cyperaceae and the family Juncaceae.

| Clade          | logLik | AIC   | $R^2_{adj}$ | Estimate | StdErr | P     |
|----------------|--------|-------|-------------|----------|--------|-------|
| Abildgaardieae | -2.36  | 8.72  | -0.08       | -0.04    | 0.1    | 0.69  |
| Cypereae       | -11.39 | 26.79 | 0.01        | -0.11    | 0.1    | 0.25  |
| Juncaceae      | -35.87 | 75.74 | 0.08        | -0.33    | 0.15   | 0.04* |
| Rhynchosporeae | -20.36 | 44.72 | -0.05       | 0.1      | 0.27   | 0.7   |

Analyses were performed using the R package CAPER v.1.0.1 (Orme, 2013), and both variables were log transformed.  
 \* indicates a significant association between variables assessed with alpha set at 0.05.

## LITERATURE CITED

- Barrett RL, Bruhl JJ, Wilson KL. 2021.** *Netrostylis*, a new genus of Australasian Cyperaceae removed from *Tetraria*. *Telopea* **24**: 53–60.
- Barrett RL, Wilson KL, Bruhl JJ. 2020.** Reinstatement and revision of the genus *Chaetospora* (Cyperaceae: Schoeneae). *Telopea* **23**: 95–112.
- Benjamini Y, Hochberg Y. 1995.** Controlling the false discovery rate: a practical and powerful approach to multiple testing. *Journal of the Royal Statistical Society: Series B (Methodological)* **57**: 89–300.
- Larridon I, Zuntini AR, L  veill  -Bourret   , et al. 2021.** A new classification of Cyperaceae (Poales) supported by phylogenomic data. *Journal of Systematics and Evolution* **59**: 852–895.
- Orme D, Freckleton R, Thomas G, et al. 2013.** *Caper: comparative analysis of phylogenetics and evolution in R*. <https://cran.r-project.org/web/packages/caper/vignettes/caper.pdf>.
- POWO. 2022.** Plants of the World Online. Facilitated by the Royal Botanic Gardens, Kew. Published on the Internet; <http://www.plantsoftheworldonline.org/>. Retrieved 11 January 2022.
- Thomas, WW. 2020.** Two new species of *Rhynchospora* (Cyperaceae) from Bahia, Brazil, and new combinations in *Rhynchospora* section *Pleurostachys*. *Brittonia* **72**: 273–281.
- WCVP. 2022.** World Checklist of Vascular Plants, version 2.0. Facilitated by the Royal Botanic Gardens, Kew. Published on the Internet; <http://wcvp.science.kew.org/>
